# Supplementary material for: At Grammatical Faculty of Language, Flies Outsmart Men
Source: PubMed Central journal article supplement (PMC3751931; doi:10.1371/journal.pone.0070284), 2013-08-23
Supplement: pone.0070284.s001.pdf [file pone.0070284.s001.pdf]

---

---

|    | <i>Drosophila</i> acts | Gender      |
|----|------------------------|-------------|
| 1  | Abdobend               | Female      |
| 2  | Abdotwist              | Female      |
| 3  | Attemptcop             | Male        |
| 4  | Circling               | Male        |
| 5  | Copulation             | Male        |
| 6  | Decamp                 | Male/female |
| 7  | Fencing                | Male        |
| 8  | Following              | Male        |
| 9  | Grooming forelegs      | Male/female |
| 10 | Grooming hindlegs      | Male/female |
| 11 | Headpos                | Male/female |
| 12 | Kick hindlegs          | Female      |
| 13 | Licking                | Male        |
| 14 | Orientation            | Male        |
| 15 | Ovipext                | Female      |
| 16 | Run                    | Male/female |
| 17 | Standing               | Male/female |
| 18 | Still                  | Male/female |
| 19 | Tapping                | Male        |
| 20 | Walk left              | Male/female |
| 21 | Walk right             | Male/female |
| 22 | Wingext left           | Male        |
| 23 | Wingext right          | Male        |
| 24 | Wingflicks left        | Male/female |
| 25 | Wingflicks right       | Male/female |
| 26 | Wingflutter            | Female      |
| 27 | Wingspread             | Male/female |
| 28 | Wingwave               | Male        |
| 29 | Wingflicks unspec.     | Male/female |
| 30 | Grooming midlegs       | Male/female |
| 31 | Tapping forelegs       | Male        |
| 32 | Kick midlegs           | Female      |
| 33 | Walk unspec.           | Male/female |
| 34 | Kick unspec.           | Male/female |
| 35 | Wingflap               | Male/female |
| 36 | Run right              | Male/female |
| 37 | Run left               | Male/female |

---

---
