# Supplementary material for: At Grammatical Faculty of Language, Flies Outsmart Men
Source: PubMed Central journal article supplement (PMC3751931; doi:10.1371/journal.pone.0070284), 2013-08-23

(a)

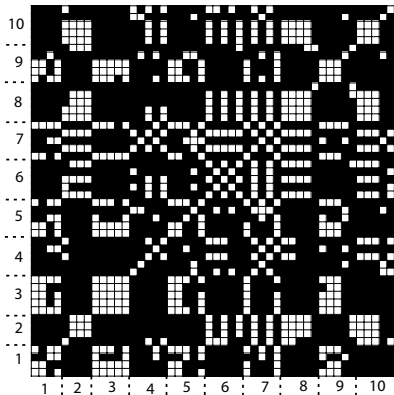

(b)

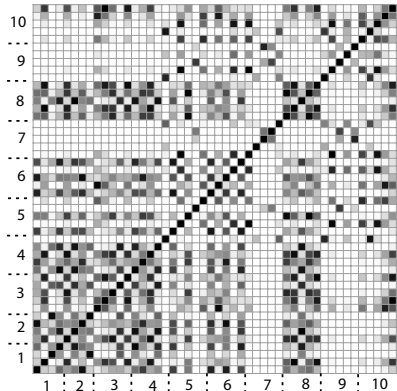

Supplement: pone.0070284.s002.pdf [file pone.0070284.s002.pdf]
